# Supplementary material
Source: publisher figshare collection journal article supplement (https://tandf.figshare.com/ndownloader/files/15073106)
Supplement: Supplementary file 1 [file 15073106]

Supplement

Tables with full regression models

Table S1. Full adjusted regression models assessing the relationship between prenatal stressand gestational age

|  | β | 95% CI | p-value |
| --- | --- | --- | --- |
| Male Sex | -0.32 | -2.51, 1.86 | 0.77 |
| Race/ethnicity (Other) | -0.37 | -5.35, 4.61 | 0.88 |
| Race/ethnicity (Hispanic) | -2.14 | -5.43, 1.15 | 0.20 |
| Race/ethnicity (Black) | -2.71 | -5.92, 0.51 | 0.10 |
| Race/ethnicity (white, ref) |  |  |  |
| >High school education | -2.02 | -4.61, 0.57 | 0.13 |
| ≤High school education (ref) |  |  |  |
| NLE score | -0.63 | -1.20, -0.06 | 0.03 |
| Pre-pregnancy BMI | -0.17 | -0.34, 0.01 | 0.06 |
| Maternal Age (years) | -0.17 | -0.37, 0.03 | 0.10 |

Table S2. Full adjusted regression models assessing the relationship between prenatal stressand preterm birth

|  | RR | 95% CI | p-value |
| --- | --- | --- | --- |
| Male Sex | 1.16 | 0.65, 2.08 | 0.61 |
| Race/ethnicity (Non-White) | 1.50 | 0.66, 3.46 | 0.34 |
| Race/ethnicity (White, ref) | 1.00 |  |  |
| >High school education | 1.01 | 0.53, 1.92 | 0.98 |
| ≤High school education (ref) | 1.00 |  |  |
| NLE score | 1.03 | 0.89, 1.19 | 0.69 |
| Pre-pregnancy BMI | 1.04 | 1.00, 1.08 | .036 |
| Maternal Age (years) | 1.04 | 0.99, 1.09 | 0.13 |

Table S3. Full adjusted regression models assessing the relationship between prenatal stressand birthweight z-score

|  | β | 95% CI | p-value |
| --- | --- | --- | --- |
| Male Sex | -0.07 | -0.22, 0.09 | 0.38 |
| Race/ethnicity (Other) | -0.20 | -0.55, 0.15 | 0.26 |
| Race/ethnicity (Hispanic) | -0.09 | -0.32, 0.14 | 0.44 |
| Race/ethnicity (Black) | -0.21 | -0.44, 0.01 | 0.07 |
| Race/ethnicity (white, ref) |  |  |  |
| >High school education | 0.08 | -0.11, 0.26 | 0.41 |
| ≤High school education (ref) |  |  |  |
| NLE score | -0.01 | -0.05, 0.04 | 0.79 |
| Pre-pregnancy BMI | 0.01 | 0.00, 0.03 | 0.05 |
| Maternal Age (years) | 0.02 | 0.00, 0.03 | 0.02 |

Table S4. Adjusted regression models assessing the relationship between prenatal stress excluding medical domain scoreand gestational age, preterm birth, and birthweight z-score*

|  |  |  | |  |
| --- | --- | --- | --- | --- |
|  |  | Estimates (95%CI) | *P*-value |  |
| Gestational age (days) |  | -0.65  (-1.30, -0.01) | 0.046 |  |
| Preterm birth (<37 weeks) (RR) |  | 1.04  (0.88, 1.22) | 0.66 |  |
| Birthweight for gestational age z-score† |  | -0.01  (-0.06, 0.03) | 0.58 |  |

β shown for gestational age and birthweight z-scores. β represents the change in gestational age in days or birthweight z-score per 1 domain increase in the prenatal NLE score. Risk ratio shown for preterm birth.

*All models adjusted for child sex, maternal age, education, race/ethnicity, and pre-pregnancy BMI.† Sex-specific Fenton birthweight for gestational age z-scores calculated using reference curves derived from growth curve modeling meta-analysis

Table S5. Full adjusted regression models assessing the relationship between prenatal stressand gestational age including a sex*NLE interaction term

|  | β | 95% CI | p-value |
| --- | --- | --- | --- |
| Male Sex | 2.76 | -0.60, 6.12 | 0.11 |
| Race/ethnicity (Other) | -0.45 | -5.40, 4.51 | 0.86 |
| Race/ethnicity (Hispanic) | -2.04 | -5.31, 1.24 | 0.22 |
| Race/ethnicity (Black) | -2.86 | -6.06, 0.34 | 0.08 |
| Race/ethnicity (white, ref) |  |  |  |
| >High school education | -1.75 | -4.33, 0.84 | 0.19 |
| ≤High school education (ref) |  |  |  |
| NLE score | 0.09 | -0.74, 0.91 | 0.84 |
| Pre-pregnancy BMI | -0.16 | -0.33, 0.01 | 0.07 |
| Maternal Age (years) | -0.18 | -0.38, 0.02 | 0.07 |
| NLE Score*Sex | -1.35 | -2.47, -0.23 | 0.02 |

Table S6. Full adjusted regression models assessing the relationship between prenatal stressand preterm birth including a sex*NLE interaction term

|  | β | 95% CI | p-value |
| --- | --- | --- | --- |
| Male Sex | 0.56 | 0.22, 1.42 | 0.22 |
| Race/ethnicity (Non-White) | 1.54 | 0.68, 3.53 | 0.30 |
| Race/ethnicity (White, ref) | 1.00 |  |  |
| >High school education | 0.96 | 0.50, 1.84 | 0.91 |
| ≤High school education (ref) | 1.00 |  |  |
| NLE score | 0.85 | 0.66, 1.10 | 0.23 |
| Pre-pregnancy BMI | 1.04 | 1.00, 1.08 | 0.04 |
| Maternal Age (years) | 1.04 | 0.99, 1.10 | 0.10 |
| NLE Score*Sex | 1.36 | 0.99, 1.87 | 0.06 |

Table S7. Full adjusted regression models assessing the relationship between prenatal stressand birthweight z-score including a sex*NLE interaction term

|  | β | 95% CI | p-value |
| --- | --- | --- | --- |
| Male Sex | 0.04 | -0.20, 0.27 | 0.77 |
| Race/ethnicity (Other) | -0.20 | -0.55, 0.15 | 0.25 |
| Race/ethnicity (Hispanic) | -0.09 | -0.32, 0.14 | 0.46 |
| Race/ethnicity (Black) | -0.22 | -0.44, 0.02 | 0.06 |
| Race/ethnicity (white, ref) |  |  |  |
| >High school education | 0.09 | -0.04, 0.08 | 0.53 |
| ≤High school education (ref) |  |  |  |
| NLE score | 0.02 | -0.04, 0.08 | 0.53 |
| Pre-pregnancy BMI | 0.01 | 0.00, 0.03 | 0.04 |
| Maternal Age (years) | 0.02 | 0.00, 0.03 | 0.02 |
| NLE Score*Sex | -0.05 | -0.12, 0.034 | 0.26 |

Table S8. Percent endorsement within each negative life event domain

| Domain | % endorsement |
| --- | --- |
| Financial | 37.4 |
| Legal | 12.3 |
| Career | 12.3 |
| Relationship | 37.4 |
| Home safety | 6.3 |
| Community safety | 33.4 |
| Medical (self) | 33.6 |
| Home issues | 38.7 |
| Prejudice | 8.3 |
| Authority | 12.3 |
| Medical (other people) | 0.0 |

Endorsement reports to report of at least 1 negative life event in each domain.
